# Supplementary material
Source: MDPI journal article supplement (https://www.mdpi.com/2624-8549/5/2/76)
Supplement: s1 [file s1]

## Supporting information for:

### Five Bonds to Carbon through Tri-Coordination in $\text{Al}_3\text{C}_3^{-/0}$

Abdul Hamid Malhan <sup>1</sup>, Venkatesan S. Thimmakondur <sup>2,\*</sup> and Krishnan Thirumoorthy <sup>1,\*</sup>

- 1 Department of Chemistry, School of Advanced Sciences, Vellore Institute of Technology, Vellore 632 014, Tamil Nadu, India; [abdulhamid.malhanb2020@vitstudent.ac.in](mailto:abdulhamid.malhanb2020@vitstudent.ac.in)
- 2 Department of Chemistry and Biochemistry, San Diego State University, San Diego, CA 92182-1030, USA

Correspondence: [vthimmakondusamy@sdsu.edu](mailto:vthimmakondusamy@sdsu.edu) (V.S.T.); [thirumoorthy.krishnan@vit.ac.in](mailto:thirumoorthy.krishnan@vit.ac.in) (K.T.)

## Contents

|                 |    |
|-----------------|----|
| List of Figures | S2 |
|-----------------|----|

|                |    |
|----------------|----|
| List of Tables | S2 |
|----------------|----|

### List of Figures

|    |                                                                                                                                                                                                                              |    |
|----|------------------------------------------------------------------------------------------------------------------------------------------------------------------------------------------------------------------------------|----|
| S1 | Isomers of $\text{Al}_3\text{C}_3^-$ with ZPVE-corrected relative energies (in $\text{kcal mol}^{-1}$ ), dipole moments (in Debye), and the number of imaginary frequencies (NImag) obtained at PBE0-D3/def2-TZVP level..... | S3 |
| S2 | Isomers of $\text{Al}_3\text{C}_3$ with ZPVE-corrected relative energies (in $\text{kcal mol}^{-1}$ ), dipole moments (in Debye), and the number of imaginary frequencies (NImag) obtained at PBE0-D3/def2-TZVP level.....   | S4 |
| S3 | Nucleus-independent chemical shifts (NICSs; in ppm) for the isomers 1a and 1n. The values in the red color indicate the NICS (1) values at 1 Å above the central C atom of the ring.....                                     | S5 |
| S4 | AdNDP bonding patterns with occupation numbers (ONs) for isomers 1a.....                                                                                                                                                     | S6 |
| S5 | AdNDP bonding patterns with occupation numbers (ONs) for isomers 1n.....                                                                                                                                                     | S7 |

### List of Tables

|    |                                                                                                                                                                                                                                                                                                                                                                    |     |
|----|--------------------------------------------------------------------------------------------------------------------------------------------------------------------------------------------------------------------------------------------------------------------------------------------------------------------------------------------------------------------|-----|
| S1 | Total energy (in a.u), zero-point vibrational energy (ZPVE; in a.u), ZPVE corrected total energy ( $E+\text{ZPVE}$ ; in a.u), relative energy ( $\Delta E + \text{ZPVE}$ ; in $\text{kcal mol}^{-1}$ ), dipole moment (in Debye), and the number of imaginary frequencies (NImag) of $\text{Al}_3\text{C}_3^-$ isomers calculated at PBE0-D3/def2-TZVP level ..... | S8  |
| S2 | Total energy (in a.u), zero-point vibrational energy (ZPVE; in a.u), ZPVE corrected total energy ( $E+\text{ZPVE}$ ; in a.u), relative energy ( $\Delta E + \text{ZPVE}$ ; in $\text{kcal mol}^{-1}$ ), dipole moment (in Debye) and the number of imaginary frequencies (NImag) of $\text{Al}_3\text{C}_3$ isomers calculated at PBE0-D3/def2-TZVP level .....    | S9  |
| S3 | Optimized geometries of $\text{Al}_3\text{C}_3^-$ isomers in Cartesian coordinates (in Angström units) obtained at PBE0-D3/def2-TZVP level .....                                                                                                                                                                                                                   | S10 |
| S4 | Optimized geometries of isomers of $\text{Al}_3\text{C}_3$ in Cartesian coordinates (in Angström units) obtained at PBE0-D3/def2-TZVP level .....                                                                                                                                                                                                                  | S12 |

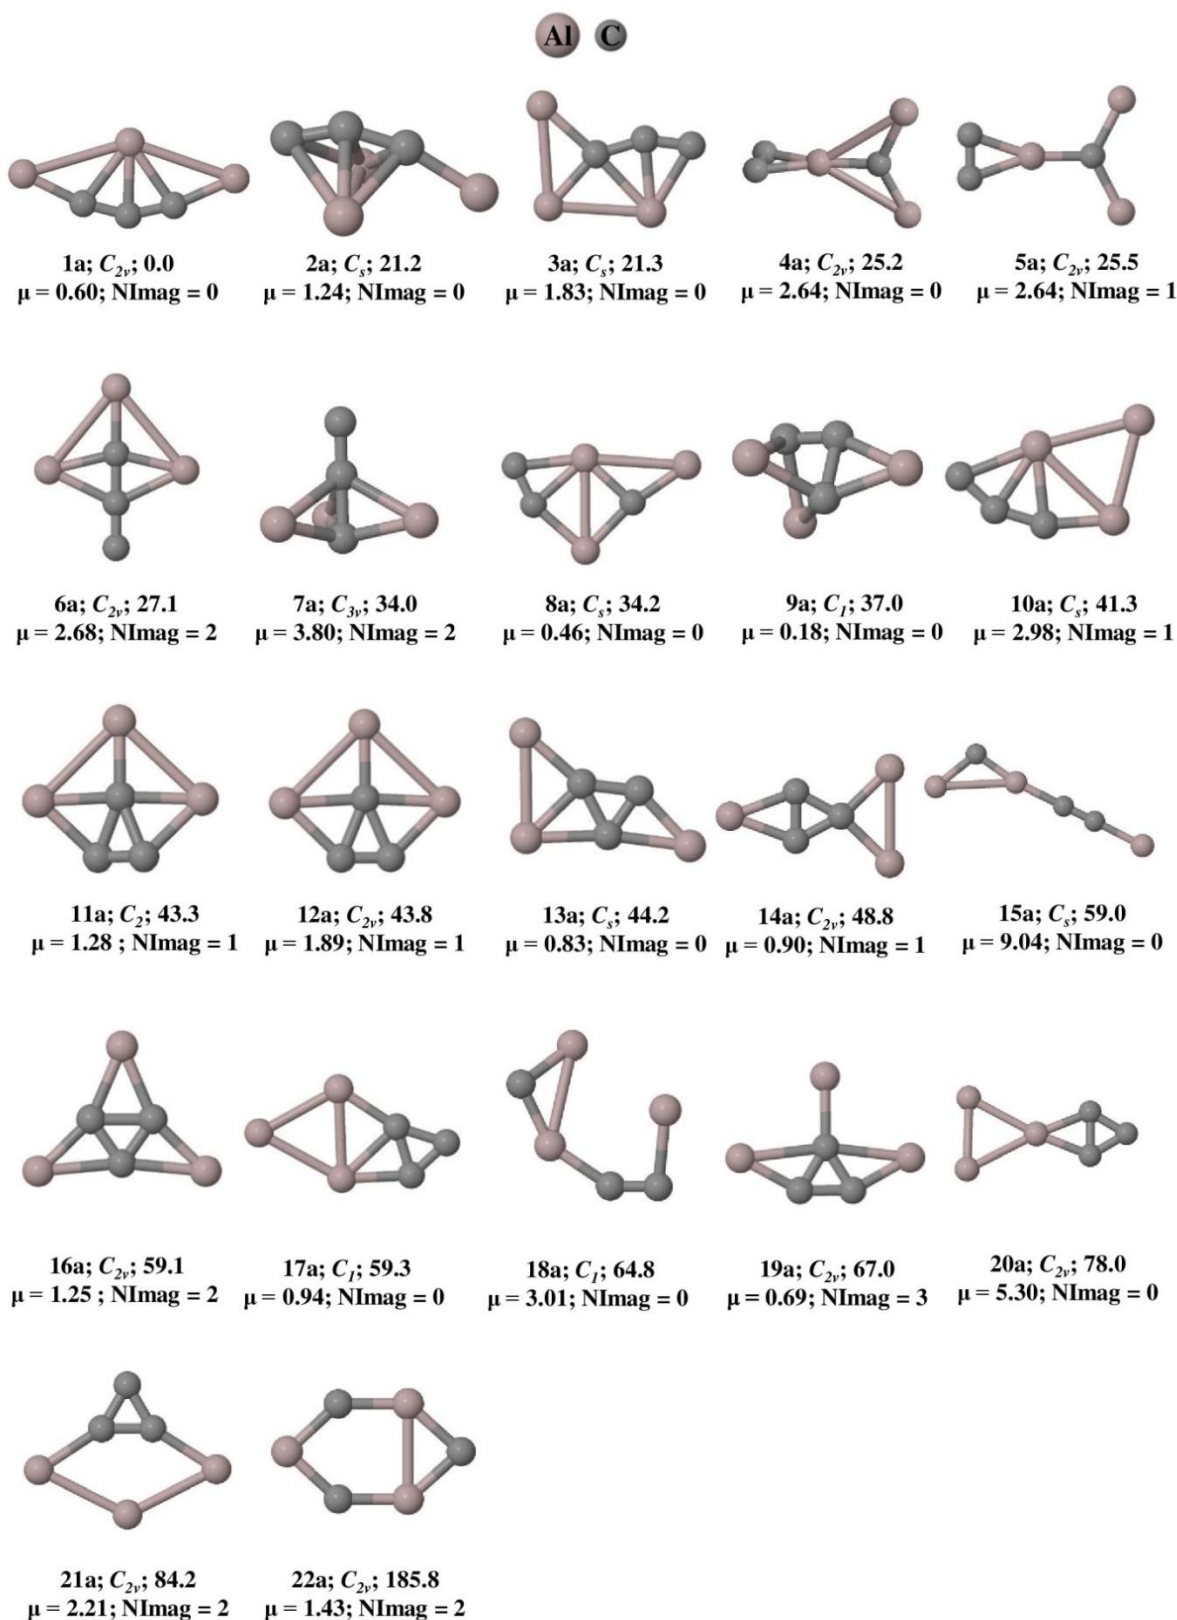

**Figure S1.** Isomers of  $\text{Al}_3\text{C}_3^-$  with ZPVE-corrected relative energies (in kcal mol<sup>-1</sup>), dipole moments (in Debye), and the number of imaginary frequencies (NImag) obtained at PBE0-D3/def2-TZVP level.

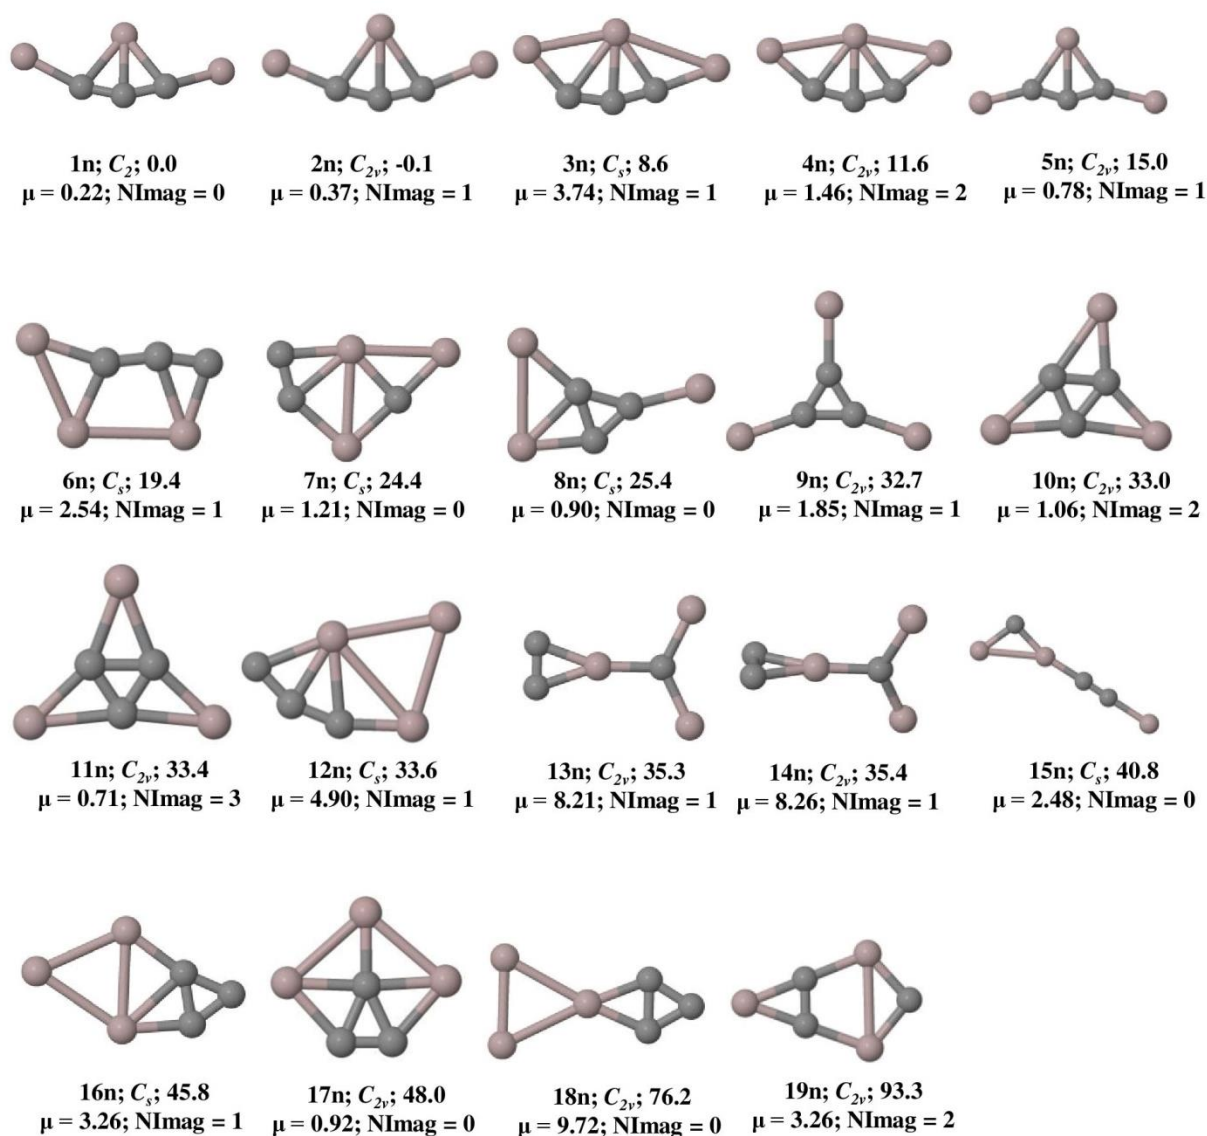

**Figure S2.** Isomers of  $\text{Al}_3\text{C}_3$  with ZPVE-corrected relative energies (in  $\text{kcal mol}^{-1}$ ), dipole moments (in Debye), and the number of imaginary frequencies (NImag) obtained at PBE0-D3/def2-TZVP level.

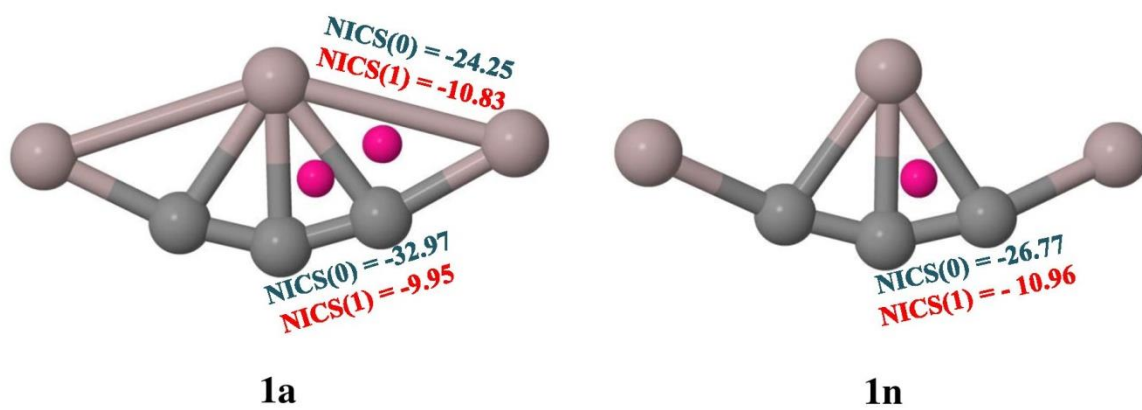

**Figure S3.** Nucleus-independent chemical shifts (NICSs; in ppm) for the isomers 1a and 1n. The values in the red color indicate the NICS (1) values at 1 Å above the central C atom of the ring.

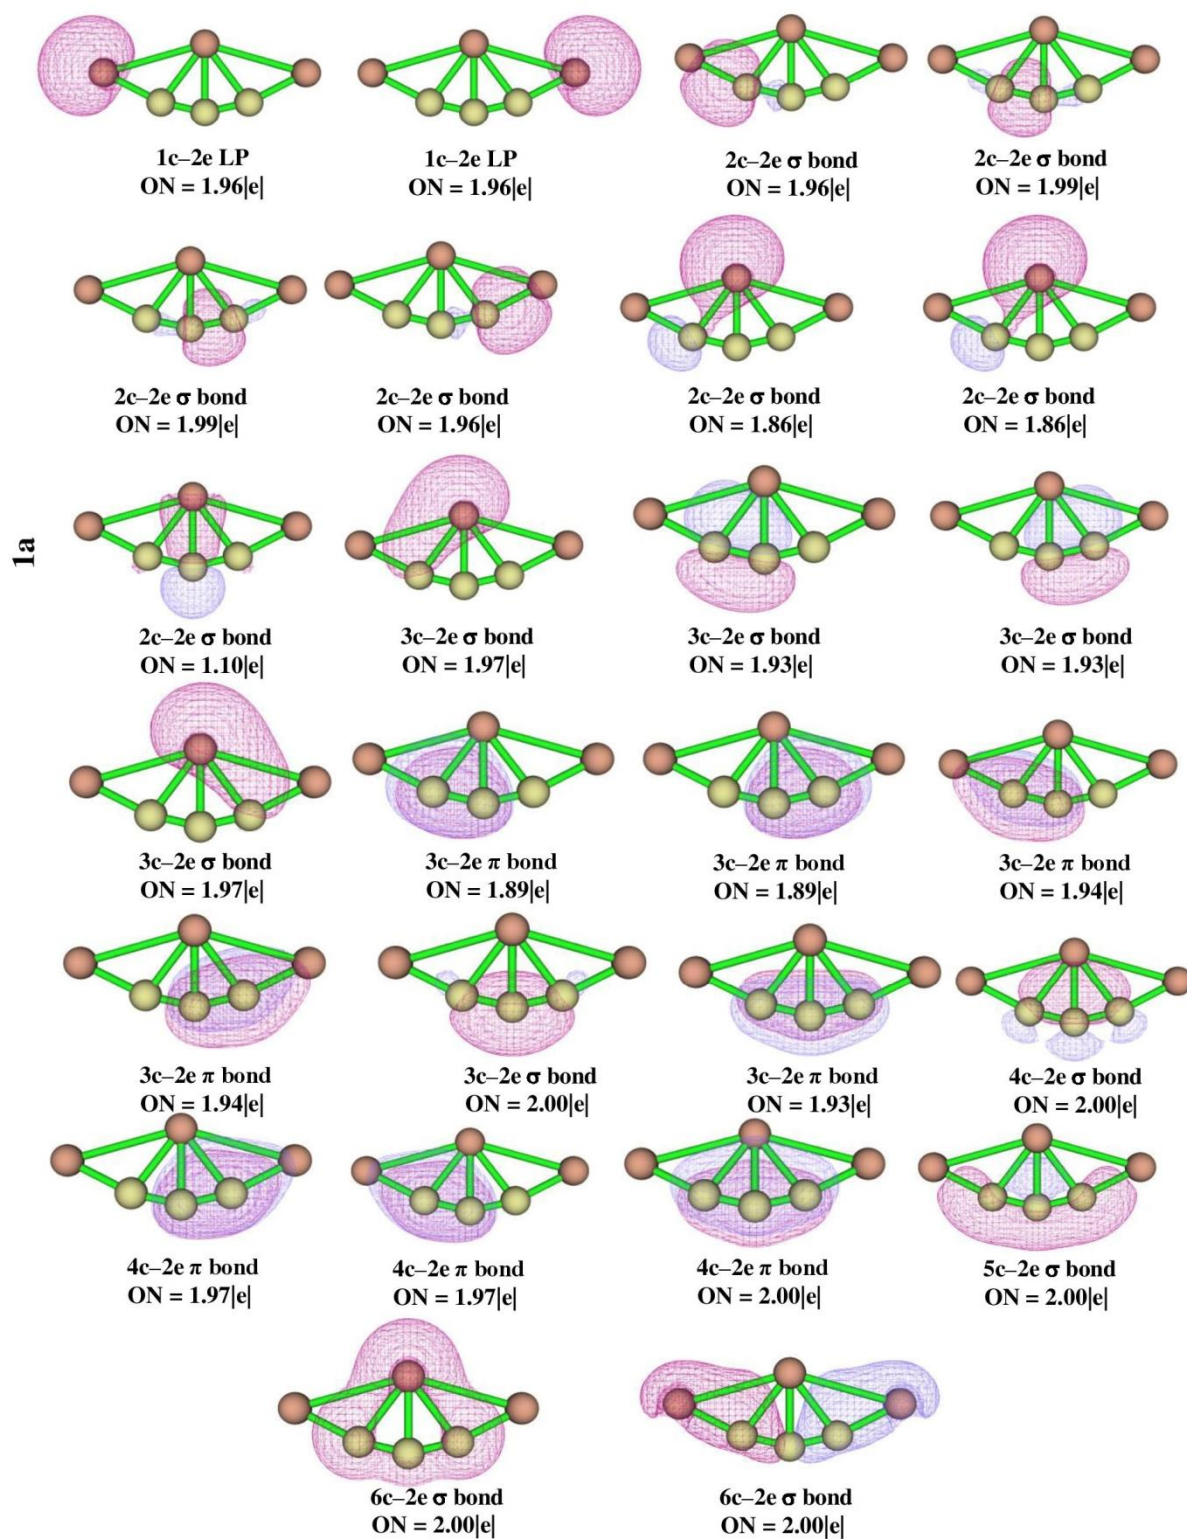

**Figure S4.** AdNDP bonding patterns with occupation numbers (ONs) for isomers 1a.



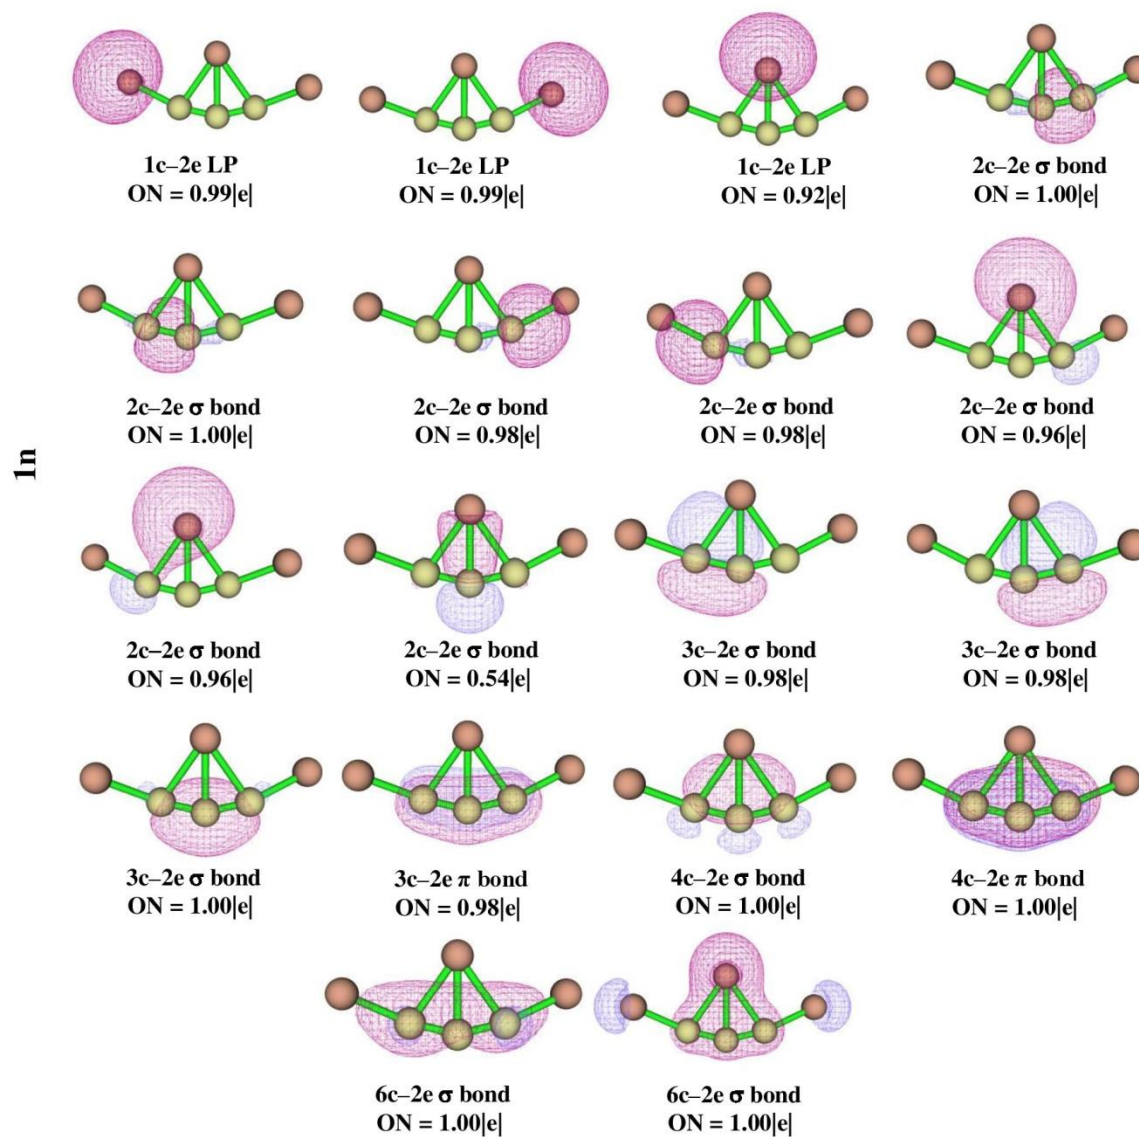

**Figure S5.** AdNDP bonding patterns with occupation numbers (ONs) for isomers 1n.

**Table S1.** Total energy (in a.u), zero-point vibrational energy (ZPVE; in a.u), ZPVE corrected total energy (E+ZPVE; in a.u), relative energy ( $\Delta E + \text{ZPVE}$ ; in kcal mol<sup>-1</sup>), dipole moment (in Debye) and the number of imaginary frequencies (NImag) of Al<sub>3</sub>C<sub>3</sub><sup>-</sup> isomers calculated at PBE0-D3/def2-TZVP level.

| PBE0-D3/def2-TZVP |                 |               |                 |                                                       |                          |       |
|-------------------|-----------------|---------------|-----------------|-------------------------------------------------------|--------------------------|-------|
| Isomer            | Energy<br>(a.u) | ZPVE<br>(a.u) | E+ZPVE<br>(a.u) | $\Delta E + \text{ZPVE}$<br>(kcal mol <sup>-1</sup> ) | Dipole moment<br>(Debye) | NImag |
| 1a                | -841.153071     | 0.015352      | -841.137719     | 0.0                                                   | 0.60                     | 0     |
| 2a                | -841.11786      | 0.01388       | -841.10398      | 21.2                                                  | 1.24                     | 0     |
| 3a                | -841.118464     | 0.014719      | -841.103745     | 21.3                                                  | 1.83                     | 0     |
| 4a                | -841.110815     | 0.013243      | -841.097572     | 25.2                                                  | 2.78                     | 0     |
| 5a                | -841.110302     | 0.013205      | -841.097096     | 25.5                                                  | 2.64                     | 1     |
| 6a                | -841.107948     | 0.013404      | -841.094544     | 27.1                                                  | 2.68                     | 2     |
| 7a                | -841.0965       | 0.01289       | -841.08361      | 34.0                                                  | 3.80                     | 2     |
| 8a                | -841.097186     | 0.01389       | -841.083296     | 34.2                                                  | 0.46                     | 0     |
| 9a                | -841.092188     | 0.013351      | -841.078837     | 37.0                                                  | 0.19                     | 0     |
| 10a               | -841.086422     | 0.014574      | -841.071848     | 41.3                                                  | 2.98                     | 1     |
| 11a               | -841.08176      | 0.012979      | -841.068781     | 43.3                                                  | 1.28                     | 1     |
| 12a               | -841.080602     | 0.012746      | -841.067856     | 43.8                                                  | 1.89                     | 1     |
| 13a               | -841.081189     | 0.013952      | -841.067237     | 44.2                                                  | 0.83                     | 0     |
| 14a               | -841.073452     | 0.013515      | -841.059936     | 48.8                                                  | 0.90                     | 1     |
| 15a               | -841.056934     | 0.013268      | -841.043665     | 59.0                                                  | 9.04                     | 0     |
| 16a               | -841.054536     | 0.011037      | -841.043498     | 59.1                                                  | 1.25                     | 2     |
| 17a               | -841.057039     | 0.013887      | -841.043152     | 59.3                                                  | 0.94                     | 0     |
| 18a               | -841.047314     | 0.012821      | -841.034493     | 64.8                                                  | 3.01                     | 0     |
| 19a               | -841.042885     | 0.011906      | -841.030978     | 67.0                                                  | 0.69                     | 3     |
| 20a               | -841.027162     | 0.013749      | -841.013413     | 78.0                                                  | 5.30                     | 0     |
| 21a               | -841.015738     | 0.012115      | -841.003622     | 84.2                                                  | 2.22                     | 2     |
| 22a               | -840.85352      | 0.011839      | -840.841681     | 186.0                                                 | 1.43                     | 2     |



**Table S2.** Total energy (in a.u), zero-point vibrational energy (ZPVE; in a.u), ZPVE corrected total energy (E+ZPVE; in a.u), relative energy ( $\Delta E + \text{ZPVE}$ ; in kcal mol<sup>-1</sup>), dipole moment (in Debye) and the number of imaginary frequencies (NImag) of Al<sub>3</sub>C<sub>3</sub> isomers calculated at PBE0-D3/def2-TZVP level.

| <b>PBE0-D3/def2-TZVP</b> |                         |                       |                         |                                                                        |                                  |              |
|--------------------------|-------------------------|-----------------------|-------------------------|------------------------------------------------------------------------|----------------------------------|--------------|
| <b>Isomer</b>            | <b>Energy<br/>(a.u)</b> | <b>ZPVE<br/>(a.u)</b> | <b>E+ZPVE<br/>(a.u)</b> | <b><math>\Delta E + \text{ZPVE}</math><br/>(kcal mol<sup>-1</sup>)</b> | <b>Dipole moment<br/>(Debye)</b> | <b>NImag</b> |
| 1n                       | -841.05269              | 0.013707              | -841.03898              | 0.0                                                                    | 0.22                             | 0            |
| 2n                       | -841.05264              | 0.013435              | -841.03921              | -0.1                                                                   | 0.37                             | 1            |
| 3n                       | -841.04023              | 0.014982              | -841.02525              | 8.6                                                                    | 3.74                             | 1            |
| 4n                       | -841.0351               | 0.014613              | -841.02049              | 11.6                                                                   | 1.46                             | 2            |
| 5n                       | -841.0287               | 0.013676              | -841.01503              | 15.0                                                                   | 0.78                             | 0            |
| 6n                       | -841.02274              | 0.014651              | -841.00809              | 19.4                                                                   | 2.54                             | 1            |
| 7n                       | -841.01467              | 0.014636              | -841.00004              | 24.4                                                                   | 1.21                             | 0            |
| 8n                       | -841.01154              | 0.013065              | -840.99847              | 25.4                                                                   | 0.90                             | 0            |
| 9n                       | -840.99878              | 0.0119                | -840.98689              | 32.7                                                                   | 1.85                             | 1            |
| 10n                      | -840.99759              | 0.011212              | -840.98638              | 33.0                                                                   | 1.06                             | 2            |
| 11n                      | -840.99607              | 0.010323              | -840.98574              | 33.4                                                                   | 0.71                             | 3            |
| 12n                      | -840.99911              | 0.013738              | -840.98538              | 33.6                                                                   | 4.90                             | 1            |
| 13n                      | -840.99573              | 0.013021              | -840.98271              | 35.3                                                                   | 8.21                             | 1            |
| 14n                      | -840.99557              | 0.012979              | -840.98259              | 35.4                                                                   | 8.26                             | 1            |
| 15n                      | -840.98742              | 0.013445              | -840.97398              | 40.8                                                                   | 2.48                             | 0            |
| 16n                      | -840.97943              | 0.013483              | -840.96594              | 45.8                                                                   | 3.26                             | 1            |
| 17n                      | -840.9771               | 0.014542              | -840.96256              | 48.0                                                                   | 0.92                             | 0            |
| 18n                      | -840.93079              | 0.013172              | -840.91761              | 76.2                                                                   | 9.72                             | 0            |
| 19n                      | -840.90324              | 0.01292               | -840.89032              | 93.3                                                                   | 3.26                             | 2            |

**Table S3.** Optimized geometries of  $\text{Al}_3\text{C}_3^-$  isomers in Cartesian coordinates (in Angström units) obtained at PBE0-D3/def2-TZVP level.

| <b>1a</b>  |           |           |           | <b>2a</b>  |           |           |           |
|------------|-----------|-----------|-----------|------------|-----------|-----------|-----------|
| Al         | -0.000000 | 0.000000  | 0.815526  | C          | 0.660151  | 0.000000  | 0.301957  |
| Al         | -2.924850 | -0.000000 | 1.662464  | C          | 0.620106  | 0.000000  | -1.067733 |
| Al         | 2.924850  | 0.000000  | 1.662464  | Al         | -0.667735 | 1.535312  | -0.502927 |
| C          | 0.000000  | 0.000000  | 2.857555  | Al         | -0.667735 | -1.535312 | -0.502927 |
| C          | -1.274801 | -0.000000 | 2.553730  | C          | -0.012397 | 0.000000  | -2.201528 |
| C          | 1.274801  | 0.000000  | 2.553730  | Al         | 0.227432  | -0.000000 | 2.116319  |
| <b>3a</b>  |           |           |           | <b>4a</b>  |           |           |           |
| Al         | -0.765751 | 0.000000  | 0.290829  | Al         | -0.843153 | -0.408535 | -0.134128 |
| Al         | 0.461785  | 0.000000  | 2.739373  | Al         | 0.022287  | 0.351447  | 3.067599  |
| C          | 1.106863  | 0.000000  | 0.930626  | C          | 0.375251  | -0.017341 | 1.251704  |
| Al         | 3.106720  | -0.000000 | 1.810121  | C          | 3.950699  | -0.581285 | 0.427584  |
| C          | 2.179146  | -0.000000 | 0.049762  | Al         | 2.138253  | 0.007921  | 0.769103  |
| C          | 3.410322  | -0.000000 | -0.294354 | C          | 3.855750  | 0.647794  | 0.144495  |
| <b>5a</b>  |           |           |           | <b>6a</b>  |           |           |           |
| C          | -0.000000 | 0.631669  | 2.860786  | Al         | 0.041331  | -0.000000 | -0.282491 |
| Al         | 0.000000  | 1.689297  | -1.639073 | C          | 0.304949  | 0.000000  | 2.658850  |
| Al         | -0.000000 | -1.689297 | -1.639073 | C          | 1.059674  | 0.000000  | 1.634652  |
| C          | -0.000000 | -0.631669 | 2.860786  | Al         | 3.195639  | 0.000000  | 2.029714  |
| C          | 0.000000  | 0.000000  | -0.796140 | C          | 1.895102  | -0.000000 | 0.496818  |
| Al         | -0.000000 | 0.000000  | 1.031058  | Al         | 3.002388  | -0.000000 | -1.011186 |
| <b>7a</b>  |           |           |           | <b>8a</b>  |           |           |           |
| C          | 0.161271  | 0.000000  | 0.261466  | Al         | -0.137540 | -0.000000 | 1.066716  |
| Al         | 1.801716  | -0.000000 | -1.240871 | C          | -2.183724 | 0.000000  | 1.287147  |
| Al         | -1.029717 | 1.678190  | -0.572138 | Al         | 2.799037  | -0.000000 | 1.259897  |
| Al         | -1.029717 | -1.678190 | -0.572138 | Al         | -0.101800 | 0.000000  | 3.732648  |
| C          | -0.179894 | -0.000000 | -1.201763 | C          | -1.628521 | 0.000000  | 2.420720  |
| C          | 0.443288  | 0.000000  | 1.499845  | C          | 1.252548  | -0.000000 | 2.338341  |
| <b>9a</b>  |           |           |           | <b>10a</b> |           |           |           |
| C          | -0.921671 | 0.187907  | 0.571214  | Al         | 0.000000  | 1.077856  | -0.000000 |
| C          | 0.683048  | -0.322281 | -0.593669 | C          | 1.982066  | 1.976682  | -0.000000 |
| C          | -0.607739 | 0.660038  | -0.623573 | Al         | -2.366430 | -0.349016 | 0.000000  |
| Al         | -0.632294 | -1.796274 | -0.157823 | C          | 1.315552  | -0.520385 | -0.000000 |
| Al         | 0.547829  | 0.763134  | -2.258339 | C          | 1.952462  | 0.689785  | -0.000000 |
| Al         | 1.090646  | 0.507477  | 1.205350  | Al         | -0.056684 | -1.719339 | 0.000000  |
| <b>11a</b> |           |           |           | <b>12a</b> |           |           |           |
| C          | 0.251493  | 0.597132  | -1.587020 | C          | 0.000000  | 0.639308  | -1.611046 |
| C          | -0.000000 | -0.000000 | -0.092189 | C          | -0.000000 | 0.000000  | -0.108435 |
| Al         | -0.074960 | 2.045679  | -0.174347 | Al         | 0.000000  | 2.057131  | -0.132782 |

|            |           |           |           |            |           |           |           |
|------------|-----------|-----------|-----------|------------|-----------|-----------|-----------|
| Al         | 0.000000  | 0.000000  | 1.817416  | Al         | 0.000000  | -0.000000 | 1.815854  |
| Al         | 0.074960  | -2.045679 | -0.174347 | Al         | -0.000000 | -2.057131 | -0.132782 |
| C          | -0.251493 | -0.597132 | -1.587020 | C          | -0.000000 | -0.639308 | -1.611046 |
| <b>13a</b> |           |           |           | <b>14a</b> |           |           |           |
| Al         | -0.264169 | 0.000000  | 0.265499  | C          | 0.495368  | -0.000000 | -0.000000 |
| Al         | -0.013260 | 0.000000  | 2.928784  | C          | -0.795376 | -0.694519 | -0.000000 |
| C          | 1.300727  | -0.000000 | 1.483323  | C          | -0.795376 | 0.694519  | -0.000000 |
| C          | 2.740513  | -0.000000 | 1.142610  | Al         | 1.880854  | -1.349035 | 0.000000  |
| C          | 1.834920  | -0.000000 | 0.102522  | Al         | -2.666263 | 0.000000  | -0.000000 |
| Al         | 3.900353  | -0.000000 | -0.396381 | Al         | 1.880854  | 1.349035  | -0.000000 |
| <b>15a</b> |           |           |           | <b>16a</b> |           |           |           |
| C          | -1.196043 | -0.000000 | 0.736357  | C          | 0.000000  | 0.000000  | -0.822761 |
| Al         | -1.779864 | -0.000000 | 2.512800  | C          | -0.000000 | -0.812309 | 0.326508  |
| Al         | 0.585504  | -0.000000 | 0.830520  | Al         | -0.000000 | -2.188927 | -1.029471 |
| Al         | 5.651669  | 0.000000  | 0.319840  | Al         | 0.000000  | 2.188927  | -1.029471 |
| C          | 2.505092  | 0.000000  | 0.630703  | Al         | -0.000000 | -0.000000 | 2.228771  |
| C          | 3.732728  | 0.000000  | 0.496136  | C          | 0.000000  | 0.812309  | 0.326508  |
| <b>17a</b> |           |           |           | <b>18a</b> |           |           |           |
| Al         | 0.030733  | -0.018829 | 0.320625  | Al         | 0.271323  | 0.017955  | 0.816129  |
| Al         | -0.837633 | 0.002915  | 2.770464  | C          | 0.061232  | -0.435830 | 2.536288  |
| Al         | 1.794786  | 0.016267  | 2.172098  | Al         | 1.622899  | 0.285536  | 3.258670  |
| C          | 3.201710  | 0.010852  | 0.789891  | C          | 2.637686  | 0.282254  | -1.081007 |
| C          | 1.980611  | -0.007265 | 0.036454  | C          | 1.453408  | 0.227589  | -0.678256 |
| C          | 3.328877  | -0.003940 | -0.563174 | Al         | 3.452536  | -0.377503 | 0.674532  |
| <b>19a</b> |           |           |           | <b>20a</b> |           |           |           |
| C          | 0.000000  | 0.739906  | -1.287595 | Al         | -1.314405 | -0.000000 | 0.785866  |
| C          | -0.000000 | 0.000000  | -0.082397 | Al         | -0.423765 | 0.000000  | 3.027067  |
| C          | -0.000000 | -0.739906 | -1.287595 | Al         | 1.277975  | -0.000000 | 1.052183  |
| Al         | 0.000000  | 2.375889  | -0.361778 | C          | 3.219479  | -0.000000 | 1.048099  |
| Al         | 0.000000  | -0.000000 | 1.918965  | C          | 2.669972  | -0.000000 | -0.302072 |
| Al         | -0.000000 | -2.375889 | -0.361778 | C          | 4.069828  | -0.000000 | -0.084786 |
| <b>21a</b> |           |           |           | <b>22a</b> |           |           |           |
| Al         | 0.000000  | -0.000000 | -1.814050 | C          | 2.319180  | -0.000000 | 0.000000  |
| C          | 0.000000  | -0.710579 | 0.577903  | Al         | 0.915676  | -1.256166 | -0.000000 |
| Al         | 0.000000  | -2.481757 | -0.573234 | C          | -0.932410 | -1.256519 | -0.000000 |
| Al         | -0.000000 | 2.481757  | -0.573234 | Al         | -2.285712 | 0.000000  | 0.000000  |
| C          | -0.000000 | 0.000000  | 1.804796  | C          | -0.932410 | 1.256519  | 0.000000  |
| C          | -0.000000 | 0.710579  | 0.577903  | Al         | 0.915676  | 1.256166  | 0.000000  |

**Table S4.** Optimized geometries of Al<sub>3</sub>C<sub>3</sub> isomers in Cartesian coordinates (in Angström units) obtained at PBE0-D3/def2-TZVP level.

| <b>1n</b>  |           |           |           | <b>2n</b>  |           |           |           |
|------------|-----------|-----------|-----------|------------|-----------|-----------|-----------|
| C          | 0.000000  | 0.000000  | -1.035913 | Al         | 0.000000  | 0.000000  | 0.699214  |
| C          | -0.000013 | 1.269254  | -0.737076 | Al         | -3.082523 | 0.000000  | 1.775782  |
| Al         | 0.000000  | 0.000000  | 1.075729  | Al         | 3.082523  | 0.000000  | 1.775782  |
| Al         | -0.498436 | 2.988915  | 0.046358  | C          | 0.000000  | 0.000000  | 2.815726  |
| Al         | 0.498436  | -2.988915 | 0.046358  | C          | -1.268641 | 0.000000  | 2.519483  |
| C          | 0.000013  | -1.269254 | -0.737076 | C          | 1.268641  | 0.000000  | 2.519483  |
| <b>3n</b>  |           |           |           | <b>4n</b>  |           |           |           |
| C          | 0.000000  | 0.061131  | -1.129903 | C          | 0.000000  | 0.000000  | -1.225285 |
| C          | 0.000000  | 1.364915  | -1.054148 | C          | 0.000000  | 1.272603  | -0.905762 |
| Al         | 0.000000  | 0.126200  | 0.906370  | Al         | 0.000000  | 0.000000  | 0.790415  |
| Al         | 0.000000  | 2.673380  | 0.206885  | Al         | 0.000000  | 2.665673  | 0.305523  |
| Al         | 0.000000  | -2.916121 | 0.114009  | Al         | 0.000000  | -2.665673 | 0.305523  |
| C          | 0.000000  | -1.171919 | -0.678367 | C          | 0.000000  | -1.272603 | -0.905762 |
| <b>5n</b>  |           |           |           | <b>6n</b>  |           |           |           |
| C          | 0.000000  | 0.000000  | -0.523117 | Al         | -0.992592 | 0.000000  | 0.484970  |
| C          | 0.000000  | 1.257652  | -0.160183 | Al         | 0.587489  | 0.000000  | 2.529223  |
| C          | 0.000000  | -1.257652 | -0.160183 | C          | 0.912930  | 0.000000  | 0.592127  |
| Al         | 0.000000  | 3.080401  | -0.615118 | Al         | 3.358730  | 0.000000  | 1.868010  |
| Al         | 0.000000  | -3.080401 | -0.615118 | C          | 2.183240  | 0.000000  | 0.105010  |
| Al         | 0.000000  | 0.000000  | 1.632945  | C          | 3.449287  | 0.000000  | -0.052983 |
| <b>7n</b>  |           |           |           | <b>8n</b>  |           |           |           |
| Al         | -0.051980 | 0.000000  | 1.080730  | Al         | -0.608469 | 0.000000  | 0.386135  |
| C          | -1.970375 | 0.000000  | 1.235694  | Al         | 0.355849  | 0.000000  | 3.097894  |
| Al         | 2.568575  | 0.000000  | 1.135743  | C          | 1.347182  | 0.000000  | 1.328742  |
| Al         | -0.146569 | 0.000000  | 3.757778  | C          | 2.557386  | 0.000000  | 0.486036  |
| C          | -1.664185 | 0.000000  | 2.445618  | C          | 1.311150  | 0.000000  | -0.090688 |
| C          | 1.264533  | 0.000000  | 2.449905  | Al         | 4.535986  | 0.000000  | 0.318238  |
| <b>9n</b>  |           |           |           | <b>10n</b> |           |           |           |
| C          | -0.574651 | -0.331775 | 0.000000  | C          | 0.753170  | 0.000000  | 0.000000  |
| C          | 0.084007  | 0.892782  | 0.000000  | C          | -0.552527 | -0.687354 | 0.000000  |
| C          | 0.815175  | -0.373639 | 0.000000  | C          | -0.552527 | 0.687354  | 0.000000  |
| Al         | -2.322085 | -1.340657 | 0.000000  | Al         | 1.443748  | -1.906092 | 0.000000  |
| Al         | -0.296062 | 2.819372  | 0.000000  | Al         | -2.535550 | 0.000000  | 0.000000  |
| Al         | 2.293617  | -1.666083 | 0.000000  | Al         | 1.443748  | 1.906092  | 0.000000  |
| <b>11n</b> |           |           |           | <b>12n</b> |           |           |           |
| C          | 0.000000  | 0.000000  | -0.851757 | Al         | 0.004190  | 1.218429  | 0.000000  |
| C          | 0.000000  | -0.761090 | 0.331882  | C          | 1.956503  | 1.964934  | 0.000000  |
| Al         | 0.000000  | -2.228858 | -1.075756 | Al         | -2.435842 | -0.322767 | 0.000000  |
| Al         | 0.000000  | 2.228858  | -1.075756 | C          | 1.354973  | -0.538755 | 0.000000  |
| Al         | 0.000000  | 0.000000  | 2.339587  | C          | 1.934441  | 0.656475  | 0.000000  |
| C          | 0.000000  | 0.761090  | 0.331882  | Al         | 0.012701  | -1.822733 | 0.000000  |
| <b>13n</b> |           |           |           | <b>14n</b> |           |           |           |
| C          | 0.000000  | 0.632293  | 2.843399  | Al         | 0.000000  | 1.678609  | -1.635361 |

|            |           |           |           |            |           |           |           |
|------------|-----------|-----------|-----------|------------|-----------|-----------|-----------|
| Al         | 0.000000  | 1.676150  | -1.626833 | Al         | 0.000000  | -1.678609 | -1.635361 |
| Al         | 0.000000  | -1.676150 | -1.626833 | C          | 0.000000  | 0.000000  | -0.830548 |
| C          | 0.000000  | -0.632293 | 2.843399  | C          | 0.633579  | 0.000000  | 2.829277  |
| C          | 0.000000  | 0.000000  | -0.813226 | Al         | 0.000000  | 0.000000  | 1.042427  |
| Al         | 0.000000  | 0.000000  | 1.058436  | C          | -0.633579 | 0.000000  | 2.829277  |
| <b>15n</b> |           |           |           | <b>16n</b> |           |           |           |
| C          | -1.220545 | 0.000000  | 0.683176  | Al         | -0.380350 | 1.402193  | 0.000000  |
| Al         | -1.666977 | 0.000000  | 2.457609  | Al         | -2.553104 | -0.196967 | 0.000000  |
| Al         | 0.586052  | 0.000000  | 0.908604  | Al         | 0.070953  | -1.274277 | 0.000000  |
| Al         | 5.655906  | 0.000000  | 0.286699  | C          | 1.935573  | -0.736812 | 0.000000  |
| C          | 2.461885  | 0.000000  | 0.660563  | C          | 1.424886  | 0.586459  | 0.000000  |
| C          | 3.682766  | 0.000000  | 0.529705  | C          | 2.841627  | 0.299963  | 0.000000  |
| <b>17n</b> |           |           |           | <b>18n</b> |           |           |           |
| C          | 0.000000  | 0.644679  | -1.592668 | Al         | 0.000000  | 1.248428  | -1.994639 |
| C          | 0.000000  | 0.000000  | -0.156529 | Al         | 0.000000  | -1.248428 | -1.994639 |
| Al         | 0.000000  | 2.008167  | -0.066628 | Al         | 0.000000  | 0.000000  | 0.420313  |
| Al         | 0.000000  | 0.000000  | 1.694885  | C          | 0.000000  | -0.728225 | 2.179389  |
| Al         | 0.000000  | -2.008167 | -0.066628 | C          | 0.000000  | 0.728225  | 2.179389  |
| C          | 0.000000  | -0.644679 | -1.592668 | C          | 0.000000  | 0.000000  | 3.399850  |
| <b>19n</b> |           |           |           |            |           |           |           |
| C          | 2.244624  | 0.000000  | 0.000000  |            |           |           |           |
| Al         | 1.036418  | -1.398395 | 0.000000  |            |           |           |           |
| C          | -0.849444 | -0.685495 | 0.000000  |            |           |           |           |
| Al         | -2.618572 | 0.000000  | 0.000000  |            |           |           |           |
| C          | -0.849444 | 0.685495  | 0.000000  |            |           |           |           |
| Al         | 1.036418  | 1.398395  | 0.000000  |            |           |           |           |
|            |           |           |           |            |           |           |           |
